# Supplementary material
Source: Springer Nature journal article supplement (https://www.springermedizin.de/resource/supplementary/12984_2012_496_MOESM2_ESM.pdf/9604722)

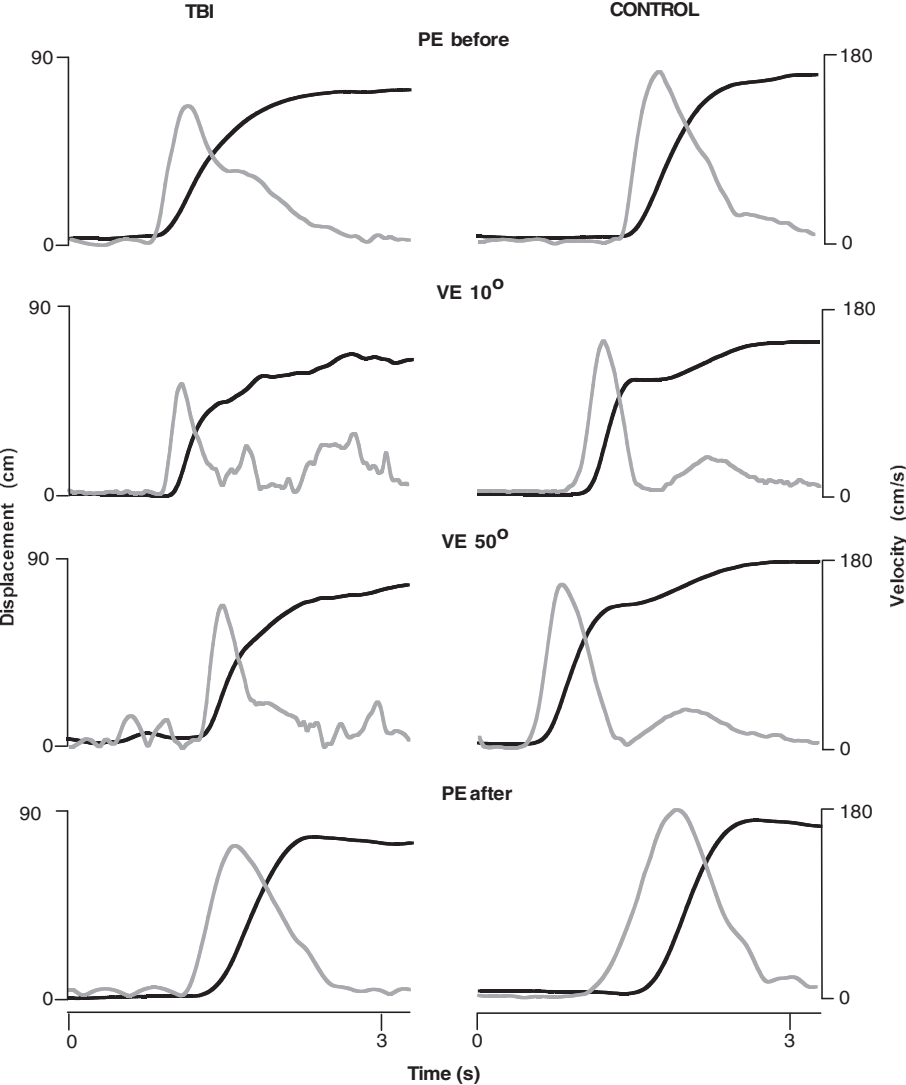

Trajectories: — displacement — velocity

Supplement: MOESM2 [file 9604722]
